# Supplementary material
Source: publisher site journal article supplement (https://www.dovepress.com/article/336912)
Supplement: Supplementary file 1 [file get_supplementary_file.php]

**Appendix 1**

**The 9 Focus Group Questions**

With regards to the teaching you have received at Broomfield Hospital throughout your placement:

1. What went well?

2. What do you think could be improved?

3. How confident do you now feel with regards to practicing clinical medicine, compared with the start of your placement?

4. How comfortable do you now feel in the ward environment, compared with the start of your placement?

5. How integrated into the medical team do you now feel, compared with the start of your placement?

6. How knowledgeable do you now feel about clinical medicine, compared with the start of your placement?

7. How closely matched to your medical school curriculum has this placement been?

8. How does your experience during this placement compare with previous placements at other hospitals?

9. What are your views on the different members of staff you have worked with during your placement (Clinical Teaching Fellows, junior doctors, registrars, consultants, nurses, physiotherapists/occupational therapists etc) with respect to their roles as educators?

**Appendix 2**

Table 1: Average post-placement final year responses on a scale of 1-5

| Question no. | Question | Likert scale | Mean score | Standard Deviation |
| --- | --- | --- | --- | --- |
| 1 | How confident do you now feel with regards to practicing clinical medicine, compared with the start of your placement? | 1=not confident at all, 5=very confident | 4.16 | 0.51 |
| 2 | How comfortable do you now feel in the ward environment, compared with the start of your placement? | 1=not comfortable at all, 5=completely comfortable | 4.22 | 0.63 |
| 3 | How integrated into the medical team do you now feel, compared with the start of your placement? | 1=not integrated at all, 5=very integrated | 4.27 | 0.8 |
| 4 | How knowledgeable do you now feel about clinical medicine, compared with the start of your placement? | 1=not knowledgeable at all, 5=very knowledgeable | 4.09 | 0.66 |
| 5 | How closely matched to your medical school curriculum has this placement been? | 1= very poorly matched, 5= very well matched | 4.58 | 0.58 |
| 6 | How would you rate the contact time between students and educators? | 1=very minimal amount of contact time, 5=very good amount of contact time | 4.84 | 0.36 |
| 7 | How would you rate the ratio of students to educators during teaching sessions? | 1=very poor ratio, 5=very good ratio | 4.89 | 0.31 |
| 8 | How would you rate the proportion of time you have spent on this placement actively learning rather than just "hanging around" waiting for learning opportunities? | 1= very low proportion of active learning experiences, 5=very good proportion of active learning experiences | 4.60 | 0.49 |
| 9 | How does your experience during this placement compare with previous placements at other hospitals? | 1=very bad, 5= very good | 4.96 | 0.21 |
